# Supplementary material for: MLL-AF4 Spreading Identifies Binding Sites that Are Distinct from Super-Enhancers and that Govern Sensitivity to DOT1L Inhibition in Leukemia
Source: PubMed Central journal article supplement (PMC5263239; doi:10.1016/j.celrep.2016.12.054), 2017-01-10
Supplement: mmc1.pdf [file mmc1.pdf]

**Cell Reports, Volume 18**

**Supplemental Information**

**MLL-AF4 Spreading Identifies Binding Sites that  
Are Distinct from Super-Enhancers and that  
Govern Sensitivity to DOT1L Inhibition in Leukemia**

**Jon Kerry, Laura Godfrey, Emmanouela Repapi, Marta Tapia, Neil P. Blackledge, Helen Ma, Erica Ballabio, SORCHA O'Byrne, Frida Ponthan, Olaf Heidenreich, Anindita Roy, Irene Roberts, Marina Konopleva, Robert J. Klose, Huimin Geng, and Thomas A. Milne**

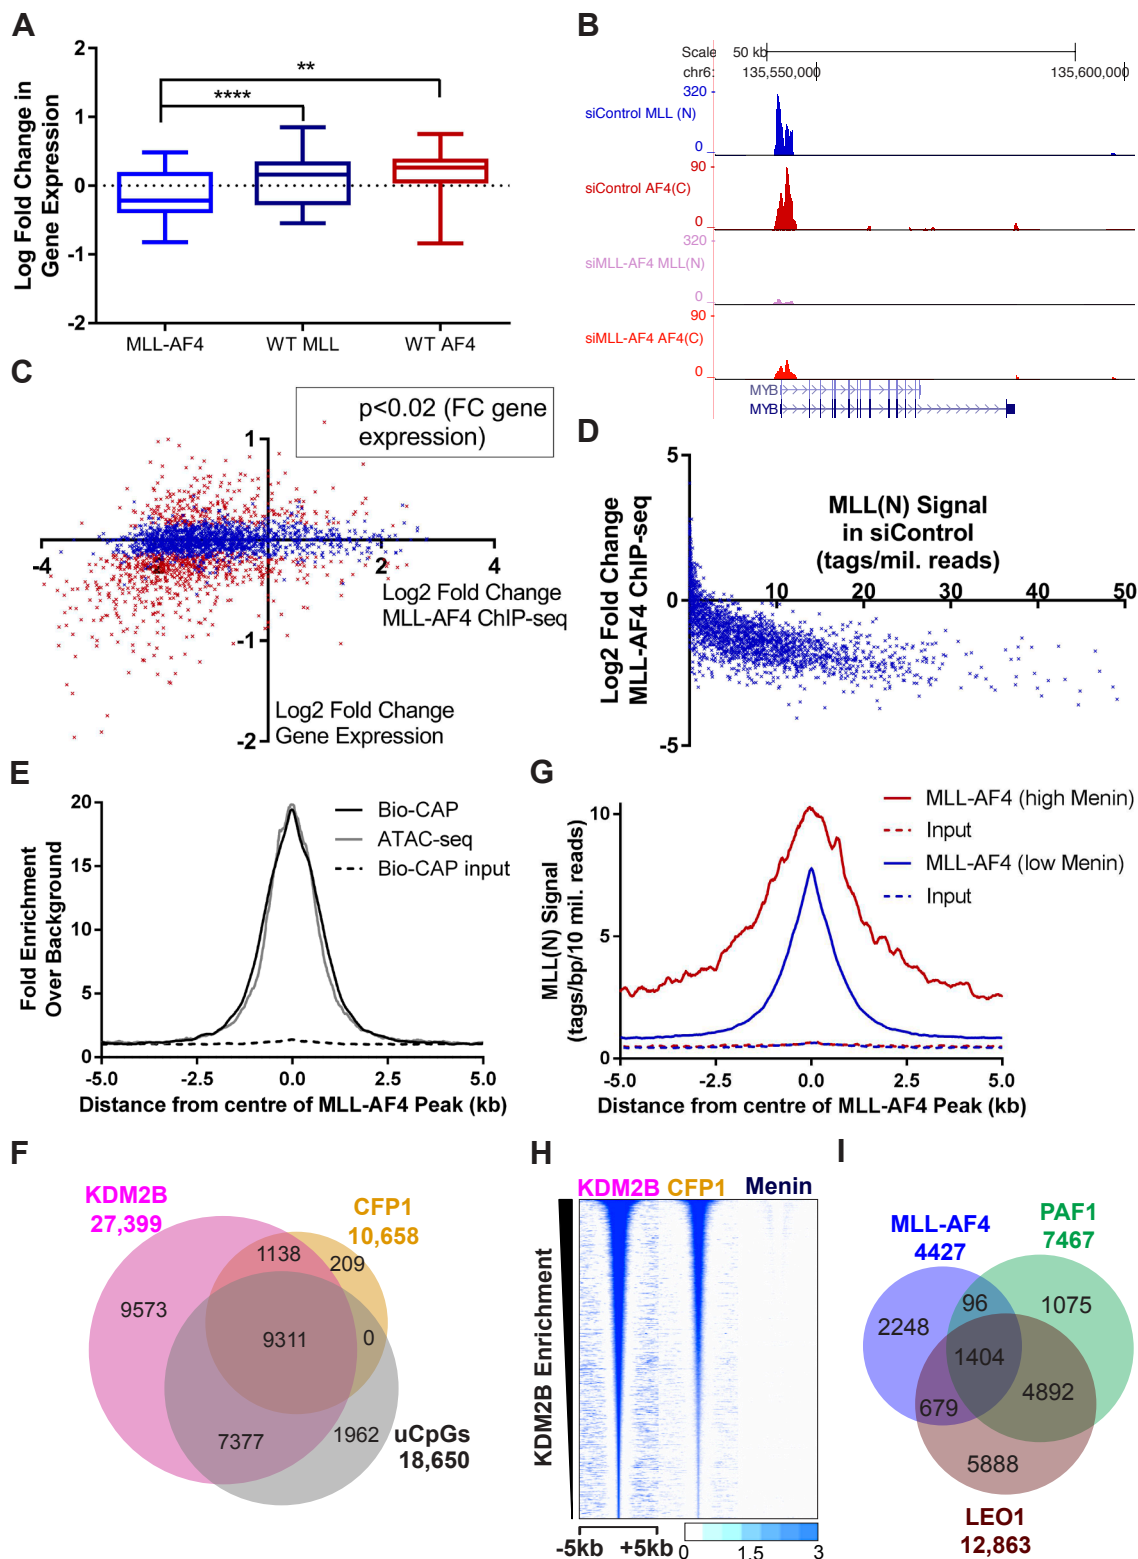

**Figure S1, MLL-AF4 recruitment, Related to Figure 1.** (A) Box and whisker plot showing the median and IQ range of fold change in gene expression, measured by nascent RNA-seq, of all significantly affected gene targets of MLL-AF4 (MLL(N) ChIP-seq peaks that overlap with AF4(C) peaks), wild-type MLL1 (MLL(N) peaks that do not overlap with AF4(C)) and wild-type AF4 (AF4(C) peaks that do not overlap with MLL(N)), following treatment with an MLL-AF4-specific siRNA in SEM cells. (B) Example ChIP-seq tracks showing MLL(N) and AF4(C) in SEM cells treated with either control siRNA (top two lanes), or MLL-AF4-specific siRNA (bottom two lanes). (C) Scatter plot showing the log2 fold-change in MLL-AF4 ChIP-seq (mean average fold-change of MLL(N) + AF4(C)) and log2 fold change in gene expression following treatment of SEM cells with MLL-AF4-specific siRNA, at all MLL-AF4 gene targets. Red points show genes that had a significant (p < 0.02) fold-change in gene expression. (D) Scatter plots showing how log2 fold-change in MLL-AF4 ChIP (same data as in (C)) is related to the amount of MLL(N) signal at MLL-AF4 gene targets in SEM cells treated with control siRNA. (E) Composite binding plot of uCpG (Bio-CAP and ATAC) reads at MLL-AF4 binding sites in SEM cells. (F) Venn diagram showing the overlap between KDM2B and CFP1 binding sites with uCpG regions (Bio-CAP/ATAC-seq), in SEM cells. (G) Composite binding plot showing MLL(N) ChIP-seq reads at MLL-AF4 binding sites that overlap with high levels of Menin ChIP-seq reads (red) or low levels of Menin ChIP-seq reads (blue), in SEM cells. (H) Heat-map showing ChIP-seq reads of KDM2B, CFP1 and Menin at all 27,399 KDM2B binding sites in SEM cells. Scale bar represents tags per bp per 107 reads. (I) Venn diagram showing the overlap between MLL-AF4 and PAFc (PAF1 and LEO1) binding sites.

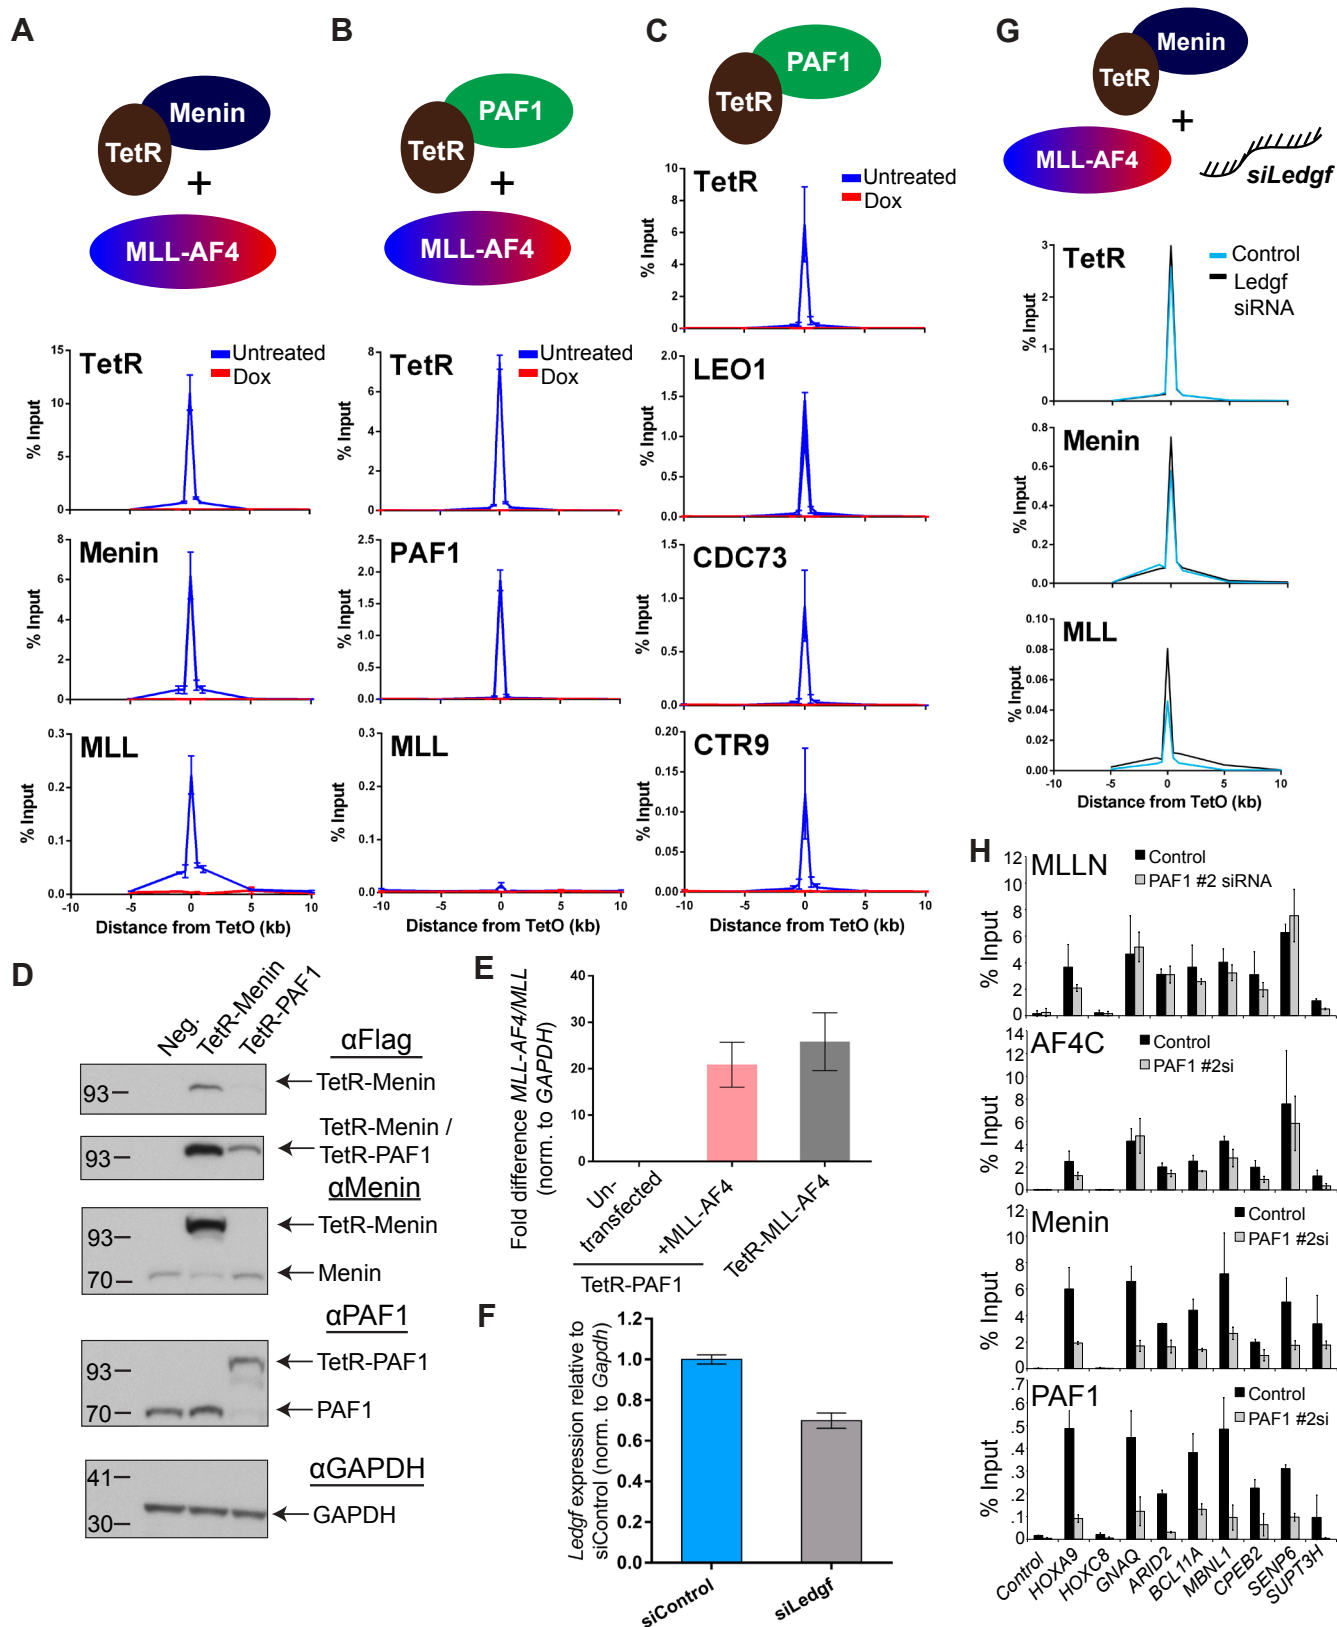

**Figure S2, Menin but not PAF1 recruits MLL-AF4, Related to Figure 2.** (A) ChIP-qPCR showing the binding of Menin and MLL-AF4 (MLL(N)) at the TetO array in TetR-Menin mES cells transfected with MLL-AF4, in the presence (red) or absence (blue) of doxycycline. (B) ChIP-qPCR showing the binding of PAF1 and MLL-AF4 in TetR-PAF1 mES cells transfected with MLL-AF4. (C) ChIP-qPCR showing the binding of the PAFc members LEO1, CDC73 and CTR9 at the TetO array in TetR-PAF1 mES cells. (D) Western blot showing the expression of TetR-Menin and TetR-PAF1 in TOT2N mES cells, stably expressing each protein. (E) cDNA levels of the human MLL-AF4 fusion gene after transfection of TOT2N mES cells with either MLL-AF4 or TetR-MLL-AF4, compared to untransfected cells. Error bars represent the standard deviation of 2 biological replicates. (F) cDNA levels of mouse *Ledgf* after transfection of TetR-Menin mES cells with either control siRNA or *Ledgf* siRNA, normalized to control. Error bars represent the standard deviation of 2 technical replicates. (G) ChIP-qPCR showing the binding of TetR-Menin and MLL-AF4 at the TetO array in TetR-Menin mES cells transfected with MLL-AF4 and *Ledgf*-specific siRNA (related to (F)). (H) MLL(N), AF4(C), Menin and PAF1 ChIP in SEM cells treated with either control (black bars) or PAF1#2 siRNAs (gray bars). Bars represent the average of two independent experiments and error bars = S.D. between experiments.

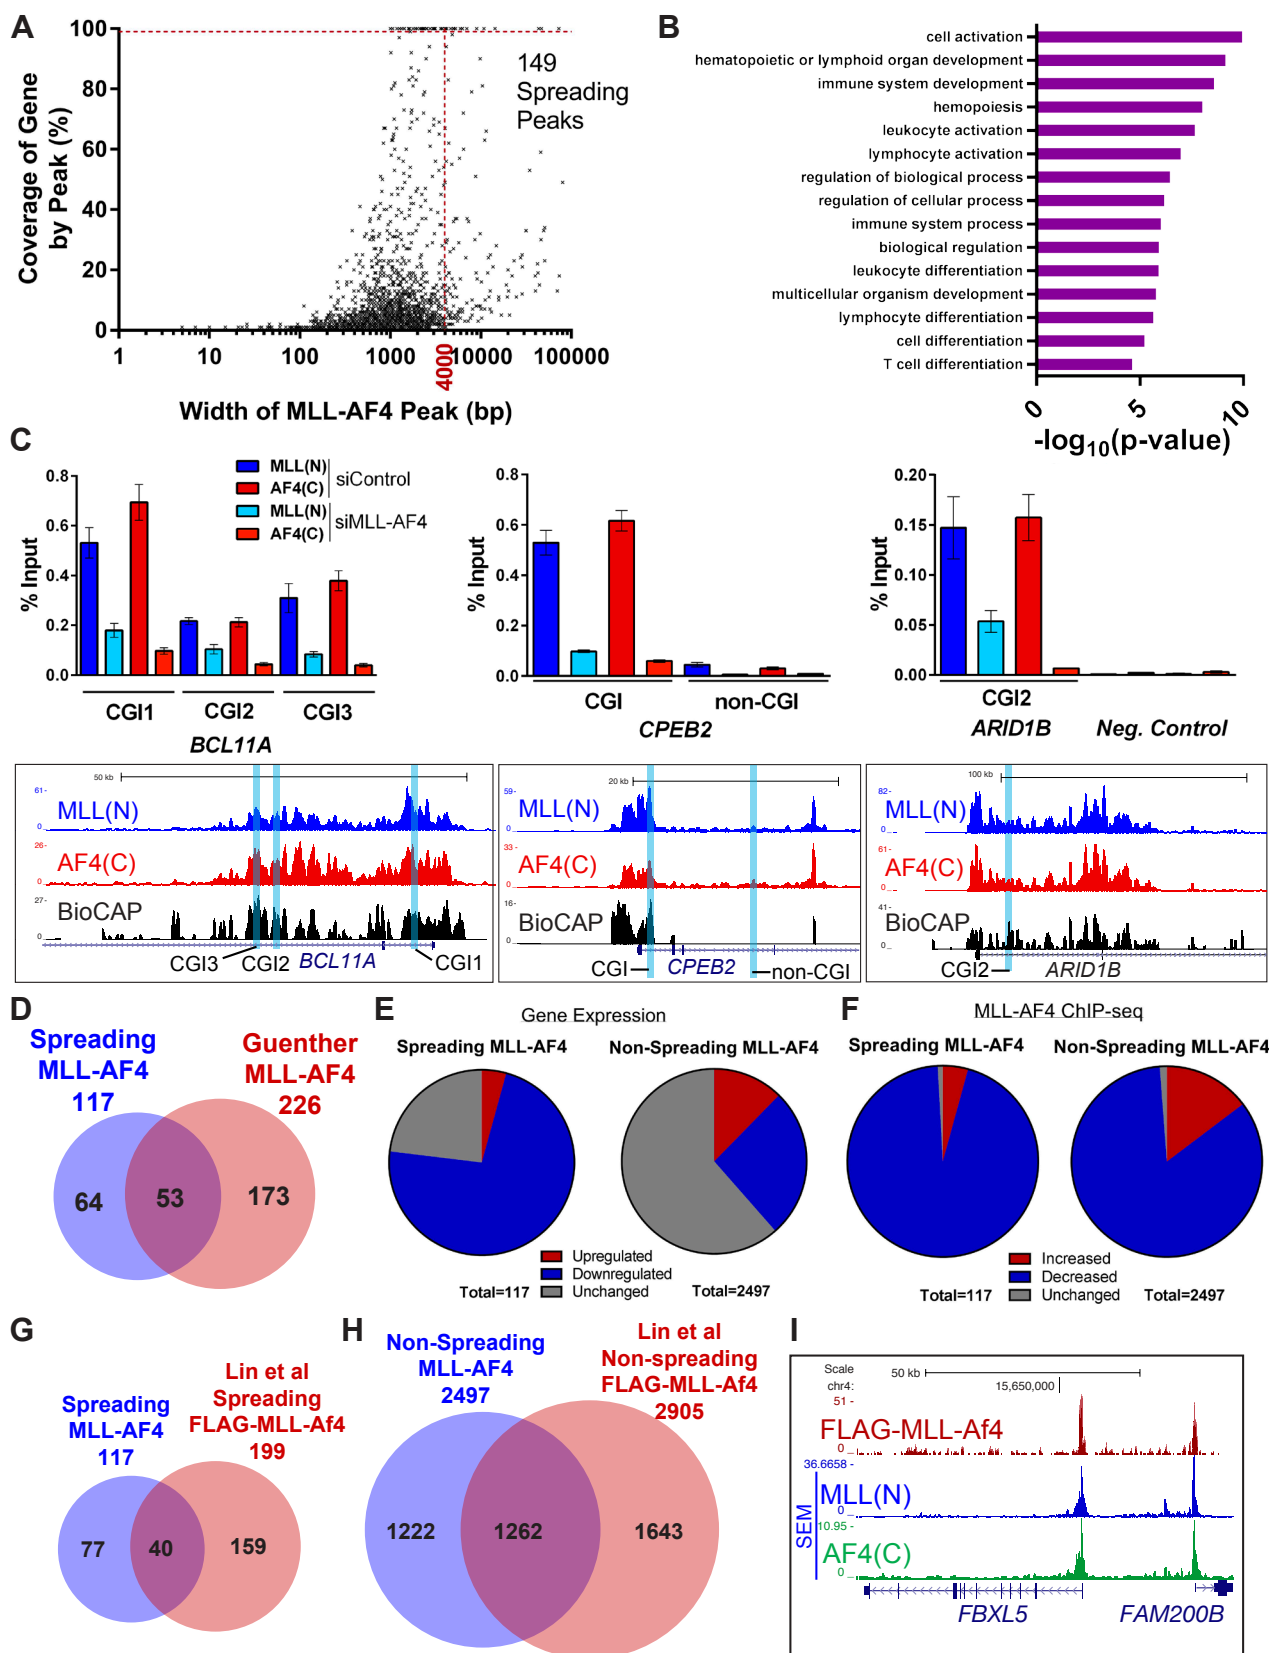

**Figure S3, MLL-AF4 binding shows spreading, Related to Figure 3.** (A) Spreading MLL-AF4 peaks were defined as peaks that extend greater than 4kb from the TSS into the gene body without going beyond the end of the gene. Using these criteria, 149 spreading MLL-AF4 peaks were identified in SEM cells. (B) Gene ontology analysis for all gene targets of spreading MLL-AF4 in SEM cells. (C) Spreading MLL-AF4 at specific gene targets confirmed using MLL-AF4 siRNA treatment followed by ChIP-qPCR of MLL(N) and AF4(C) (top). ChIP-seq tracks (bottom) show locations of the primers used. (D) Venn diagram showing the overlap between spreading MLL-AF4 gene targets in SEM cells and all MLL-AF4 targets identified in SEM cells by Guenther et al. (Guenther et al., 2008). (E) Pie charts showing the proportion of spreading MLL-AF4 and non-spreading MLL-AF4 gene targets in SEM cells that are either significantly ( $p < 0.02$ ) upregulated (red), downregulated (blue) or unchanged (grey), following treatment with MLL-AF4-specific siRNAs. Data represents nascent RNA-seq from 3 biological replicates. (F) Pie charts showing the proportion of MLL-AF4 peaks at spreading and non-spreading gene target promoters in SEM cells that show an increase (red), decrease (blue) or no change (grey) in MLL-AF4 ChIP-seq signal following MLL-AF4c siRNA treatment. (G-H) Venn diagrams showing the overlap between spreading and non-spreading MLL-AF4 gene targets in SEM cells compared to a FLAG-MLL-AF4 ChIP-seq dataset from CD34+ cord blood cells (Lin et al., 2016). (I) Example ChIP-seq tracks showing non-spreading at FBXL5 and FAM200B in both MLL-AF4 SEM cells and FLAG-MLL-Af4 cord blood cells (Lin et al., 2016).

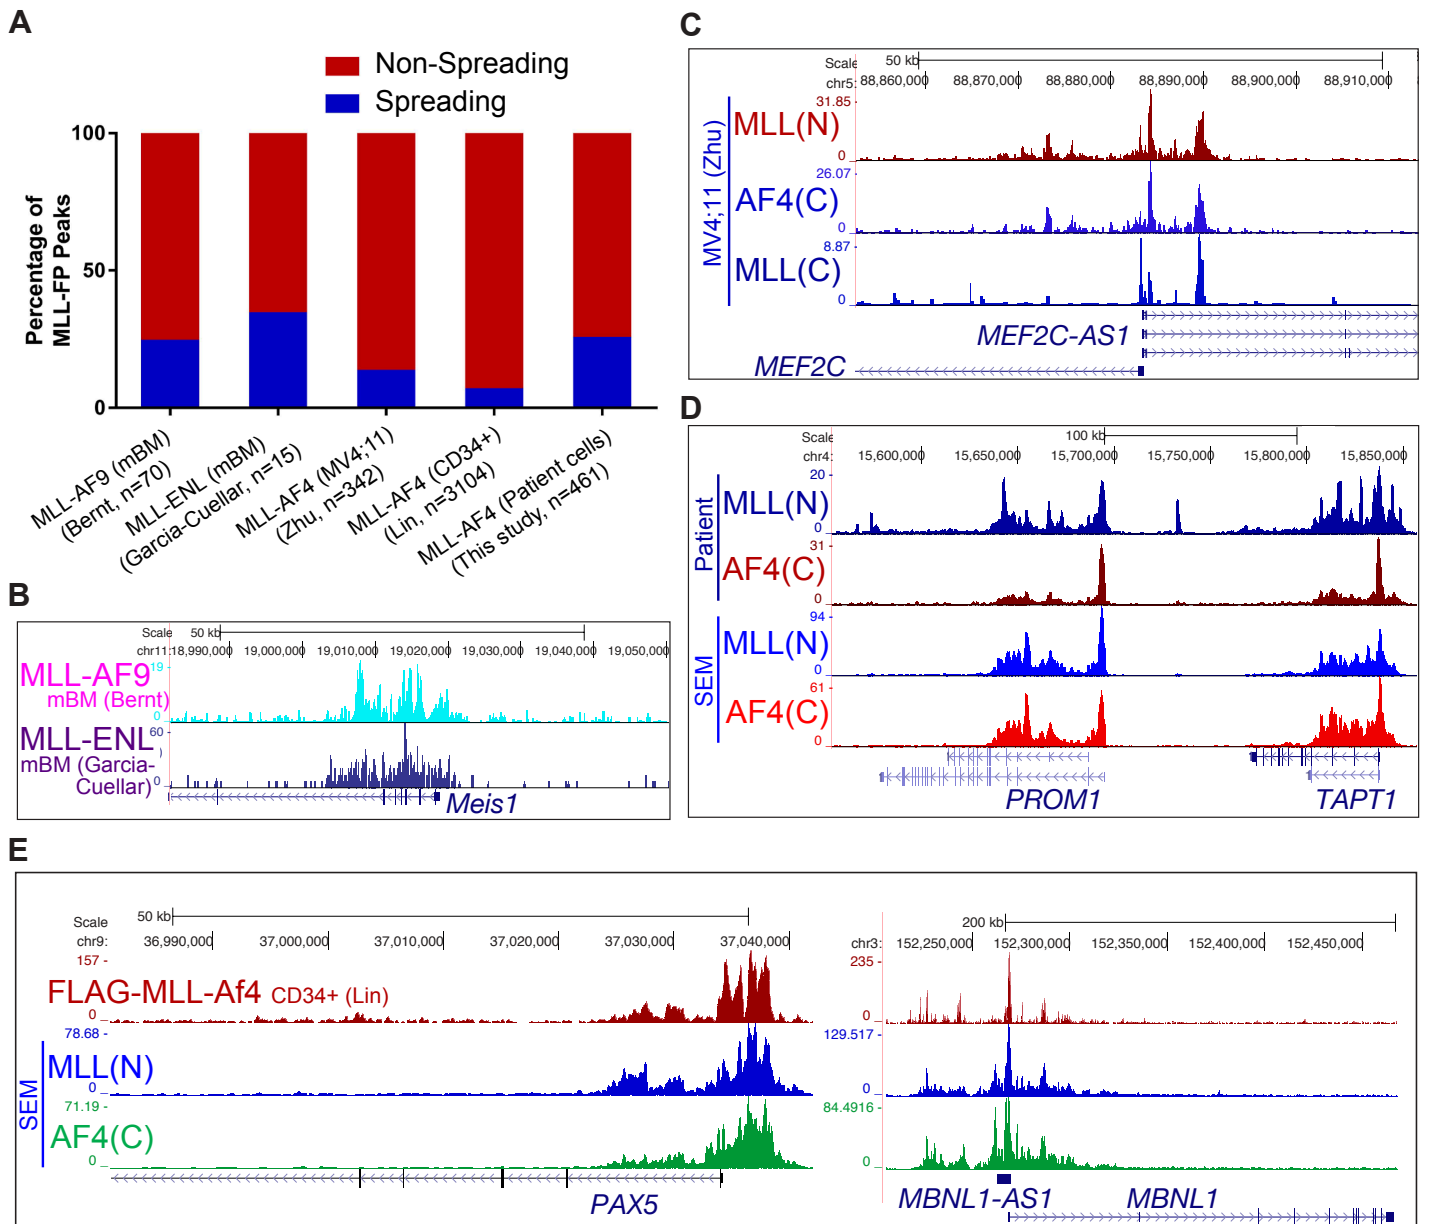

**Figure S4, MLL-FPs display spreading but wild type MLL does not, Related to Figure 4.** (A) Bar plot showing the percentages of spreading and non-spreading peaks within MLL-FP protein peaks in previously published datasets: MLL-AF9 (Bernt et al., 2011), MLL-ENL (Garcia-Cuellar et al., 2016) and MLL-AF4 (Zhu et al., 2016), as well as amongst MLL-AF4 peaks in patient cells. (B) Example ChIP-seq tracks showing spreading MLL-AF9 and spreading MLL-ENL at *Meis1* in mouse bone marrow cells (datasets same as in (A)). (C) Example ChIP-seq tracks showing spreading MLL-AF4 (MLL(N) and AF4(C)) at *MEF2C* in MV4;11 cells (dataset same as in (A)). MLL(C) was used to show the corresponding lack of spreading by wild-type MLL. (D) Example ChIP-seq tracks showing spreading MLL-AF4 (MLL(N) and AF4(C)) at *PROM1* and *TAPT1* in both MLL-AF4 patient cells and SEM cells. (E) Example ChIP-seq tracks comparing spreading MLL-AF4 (MLL(N) and AF4(C)) at *PAX5* and *MBNL1* in both MLL-AF4 SEM cells and FLAG-MLL-Af4 cord blood cells (Lin et al., 2016).

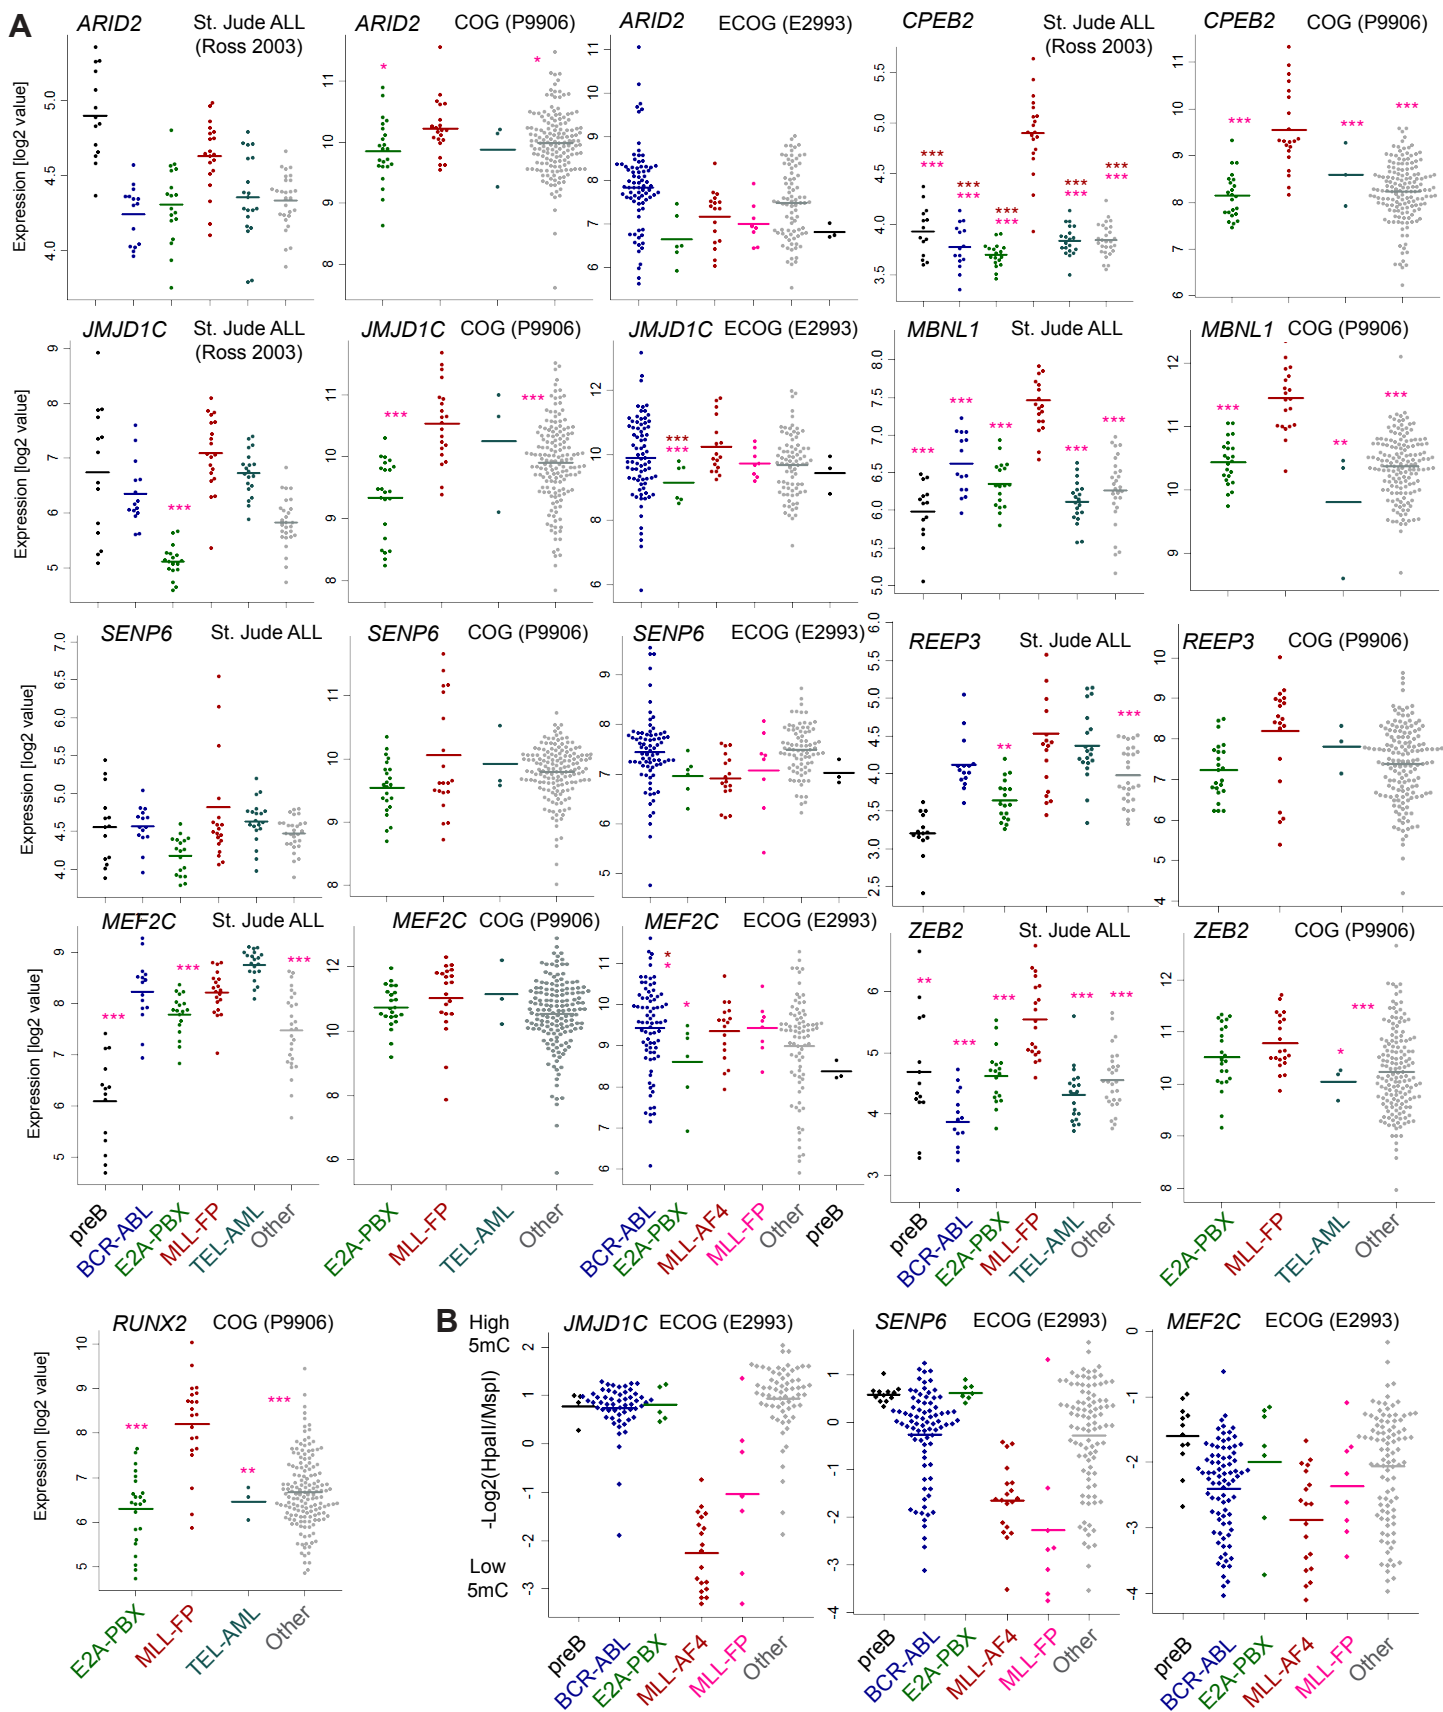

**Figure S5, Expression and DNA methylation of spreading targets in patients, Related to Figure 4.** (A) Expression of the genes indicated in patient samples from three large cohorts of patients with ALL including the Eastern Cooperative Oncology Group (ECOG) Clinical Trial E2993, the Children’s Oncology Group (COG) Clinical Trial P9906 and the St. Jude Research Hospital pediatric ALL clinical trial cohort. Details of each trial are listed in supplemental methods. Dark red \* indicates a significant difference compared to MLL-AF4, pink \* indicates a significant difference compared to the MLL-FP group, no \* indicates that the gene is not significantly upregulated in MLL-FP samples. \*\*\* =  $p < 0.001$ , \*\* =  $p < 0.01$ , \* =  $p < 0.05$ . All p-values are listed in Table S5. (B) DNA methylation data (collected using the HELP assay) for JMJD1C, SENP6 and MEF2C from the (ECOG) Clinical Trial E2993.



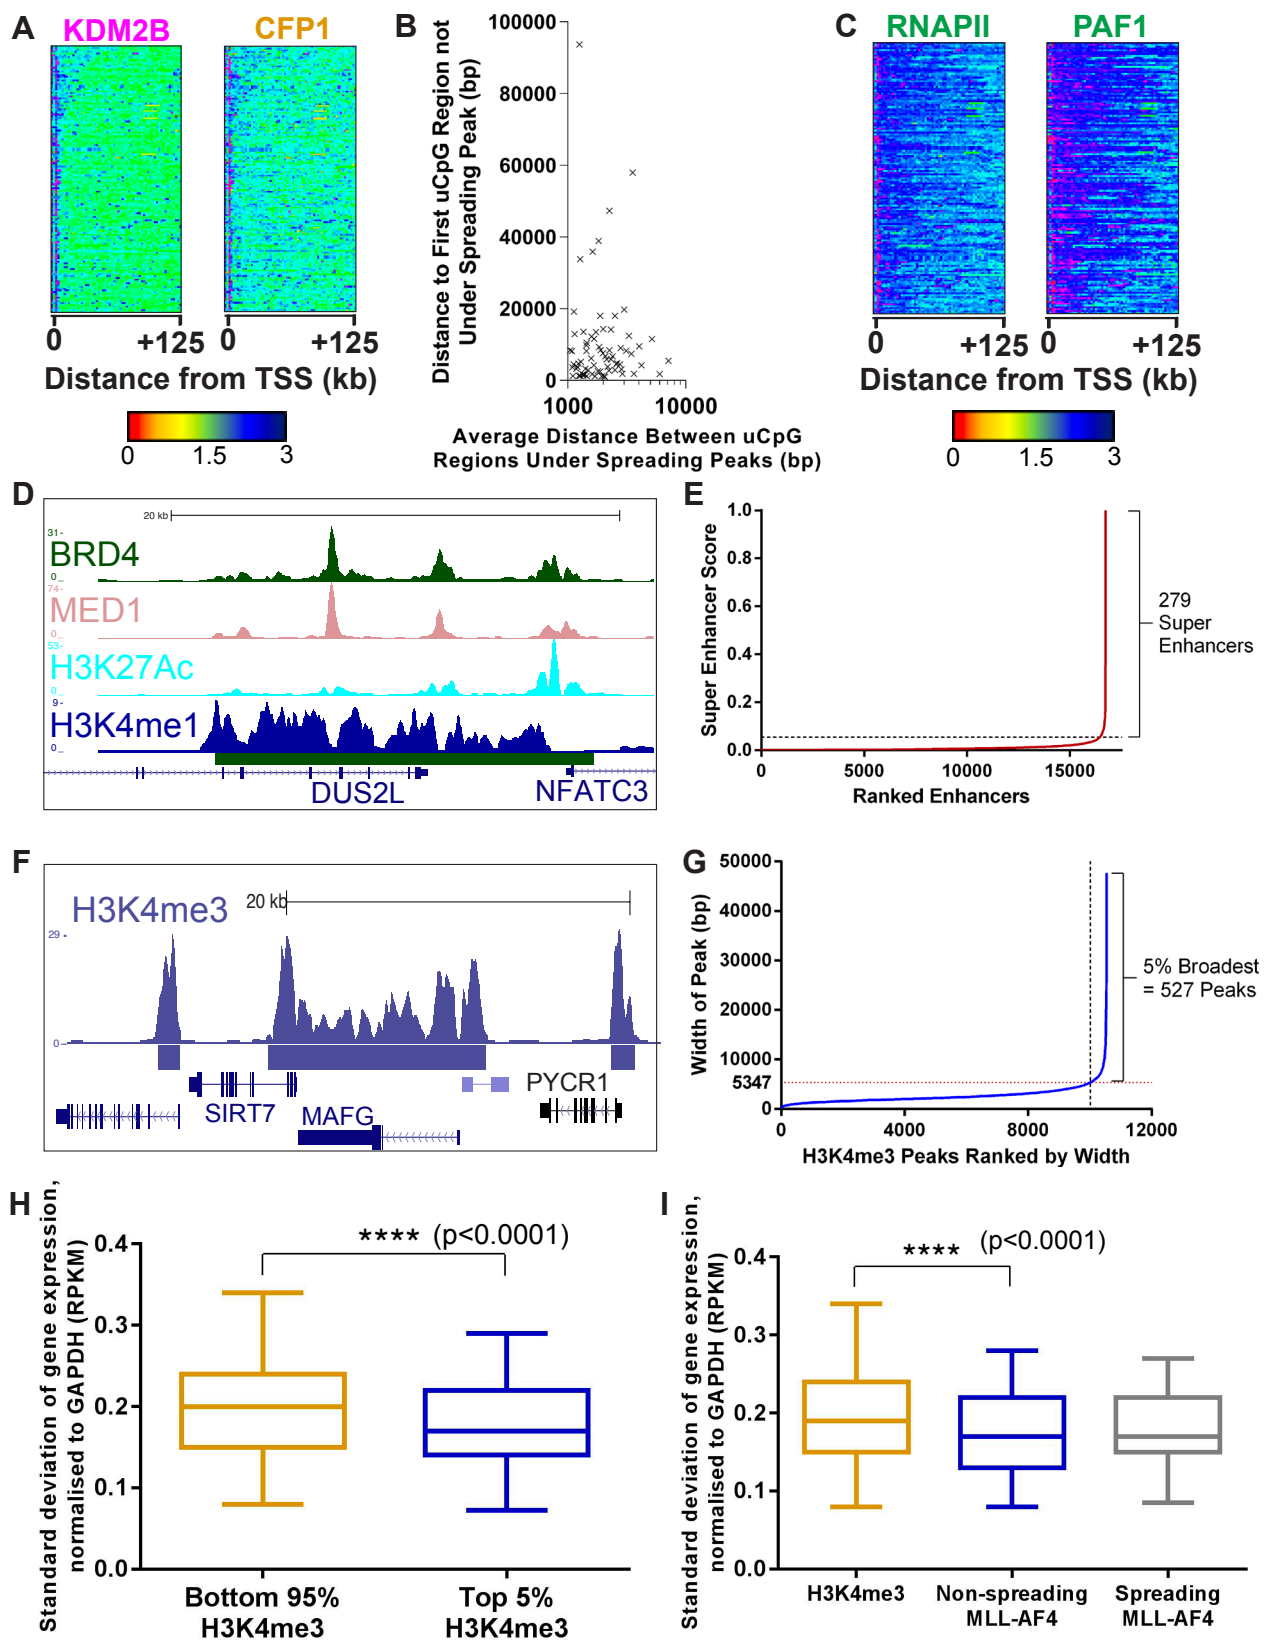

**Figure S6, Super enhancers and Broad H3K4Me3 domains, Related to Figure 5.** (A) Heat-map showing KDM2B (left) and CFP1 (right) ChIP-seq reads at all 149 spreading MLL-AF4 peaks in SEM cells. Scale bar represents tags per bp per 107 reads. (B) Scatter plot showing the distance in bp between uCpG regions (Bio-CAP-seq peaks) found under spreading MLL-AF4 peaks against the distance to the first adjacent uCpG region that is not under the spreading peak but found within the body of the same gene. (C) Heat-map showing RNA polymerase II (RNAPII) and PAF1 ChIP-seq reads at all 149 spreading MLL-AF4 peaks in SEM cells. Scale bar as in (A). (D) Example ChIP-seq track of a super enhancer at DUS2L in SEM cells. (E) Enhancers characterized by BRD4, MED1, H3K27ac and H3K4me1 in SEM cells were ranked by their super enhancer score. In total, 279 were classed as super enhancers. (F) Example ChIP-seq track of a broad H3K4me3 peak (i.e. one of the top 5% broadest H3K4me3 peaks) spanning SIRT7 and MAFG, in SEM cells. Two normal (non-broad) H3K4me3 peaks are shown either side. (G) All H3K4me3 peaks in SEM were ranked based on length and the top 5% were classed as “broad” H3K4me3. This identified 527 broad H3K4me3 peaks. (H) Box and whisker plot showing the median and IQ range of transcriptional consistency of genes marked by the 5% broadest H3K4me3 peaks (blue) compared to genes marked by the remaining 95% of H3K4me3 peaks (orange). \*\*\*\*= $p < 0.0001$ , two-tailed Mann-Whitney U test. (I) Box and whisker plot showing the median and IQ range of transcriptional consistency of gene targets of non-spreading MLL-AF4 (blue,) spreading MLL-AF4 (gray) as well as all genes marked by H3K4me3 (orange). \*\*\*\*= $p < 0.0001$ , two-tailed Mann-Whitney U test

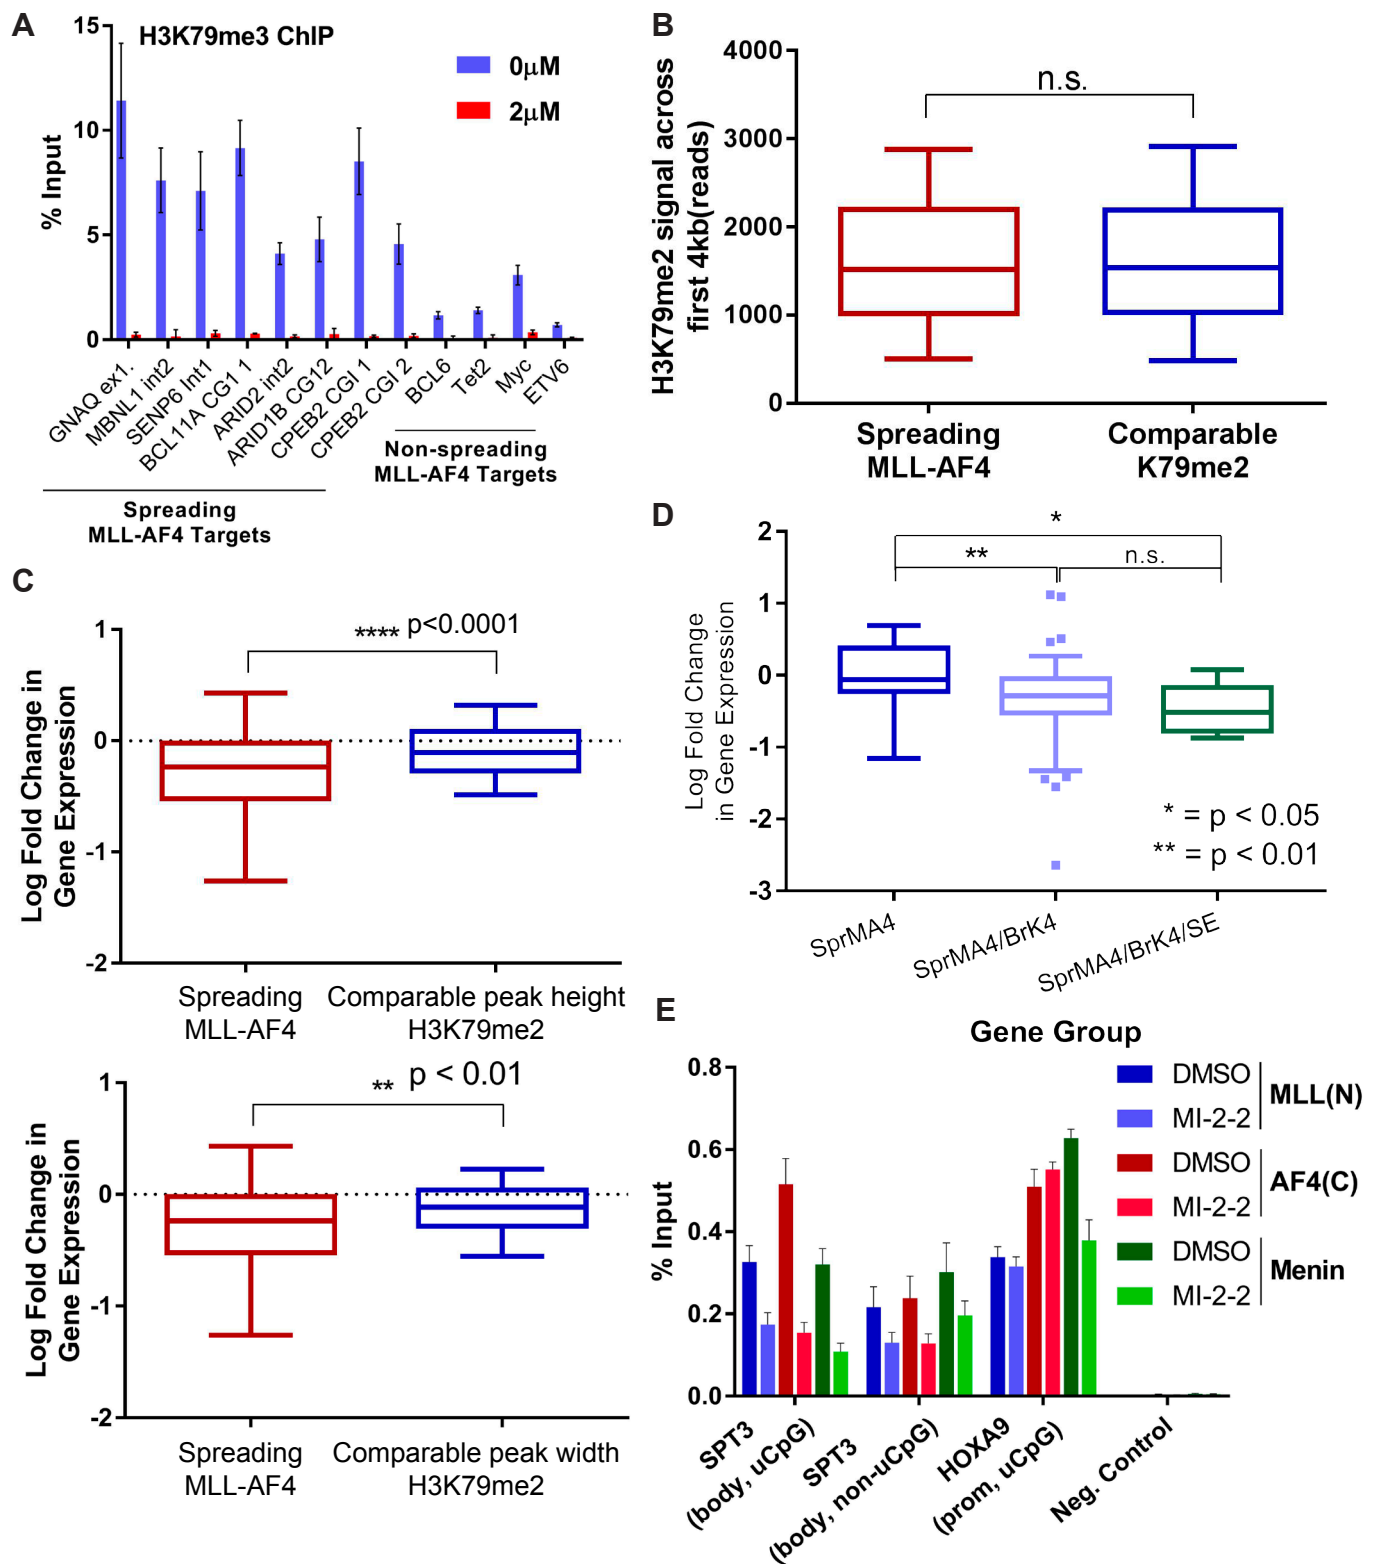

**Figure S7, Spreading predicts sensitivity to loss of H3K79me2/3, Related to Figure 6.** (A) ChIP-qPCR of H3K79me3 at spreading and non-spreading MLL-AF4 gene targets in SEM cells treated with either DMSO control or  $2\mu\text{M}$  EPZ-5676, for 7 days. (B) Box and whisker plot showing the median and IQ ranges of H3K79me2 reads across the first 4kb of the gene body of (i) spreading MLL-AF4 targets ( $n = 117$ ) and (ii) randomly selected genes with comparable levels of H3K79me2 to that of spreading MLL-AF4 targets ( $n = 117$ ). Spreading MLL-AF4 targets were omitted from the selection of genes for group (ii). N.s. = not significant, Mann-Whitney U test. (C) Box and whisker plot showing the median and IQ range of fold change in gene expression, measured by nascent RNA-seq, of genes in group (i) and (ii) from (B) following a 7-day treatment of EPZ-5676 (top) and comparing to similar peak width rather than peak height (bottom). \*\*\*\*= $p < 0.0001$ , \*\*= $p < 0.01$ , Mann-Whitney U test. (D) Box and whisker plot showing the median and IQ range of fold change in gene expression, measured by nascent RNA-seq, for gene targets of just spreading MLL-AF4 (SprMA4), both spreading MLL-AF4 and broad H3K4me3 (SprMA4/Brk4), and spreading MLL-AF4, broad H3K4me3 and Super Enhancers (SprMA4/Brk4/SE) following a 7-day treatment with  $2\mu\text{M}$  EPZ-5676. \*= $p < 0.05$ , \*\*= $p < 0.01$ , Mann-Whitney U test. (E) ChIP-qPCR of MLL(N), AF4(C) and Menin in SEM cells following treatment with either DMSO or  $12.5\mu\text{M}$  MI-2-2 (Shi et al., 2012) for 48 hours at two loci in the MLL-AF4 spreading domain at SPT3 (one a uCpG region, left, and the other a non-uCpG region, right) and the uCpG promoter of HOXA9. Error bars represent the standard deviation of PCR replicates.



**Table S1, (excel file) MLL-FP gene target lists, related to Figure 1 and Figure 4**

**Table S2, Spreading MLL-AF4 gene targets, Related to Figure 3 and Figure S3A.**

| <b>Gene Name (117)</b> | <b>Gene Isoforms (149), RefSeq ID</b> |
|------------------------|---------------------------------------|
| ADAM10                 | NM_001110                             |
| AFF1                   | NM_001166693                          |
| ANP32A                 | NM_006305                             |
| APOLD1                 | NM_001130415                          |
| ARHGDIB                | NM_001175                             |
| ARID1B                 | NM_020732                             |
| ARID2                  | NM_152641                             |
| ARPP21                 | NM_001267617; NM_016300; NM_001267619 |
| ARRDC3                 | NM_020801                             |
| ATP8B4                 | NM_024837; NR_073598                  |
| BCL11A                 | NM_022893                             |
| BCL2                   | NM_000633                             |
| C5orf56                | NR_045116                             |
| CACNB4                 | NM_001005746; NM_000726               |
| CAMK2D                 | NM_172127                             |
| CCDC162P               | NR_028595                             |
| CDCA7                  | NM_031942                             |
| CDK14                  | NM_012395                             |
| CDK6                   | NM_001145306; NM_001259               |
| CELF2                  | NM_001083591                          |
| CHD2                   | NM_001271                             |
| CLEC2B                 | NM_005127                             |
| CLEC2D                 | NM_001197319                          |
| CLECL1                 | NM_001253750                          |
| CNST                   | NM_001139459                          |
| CPEB2                  | NM_001177383                          |
| CTBP2                  | NM_001083914; NM_001329               |
| CXorf21                | NM_025159                             |
| CXXC5                  | NM_016463                             |
| CYTIP                  | NM_004288                             |
| DGKD                   | NM_152879                             |
| DIAPH1                 | NM_005219                             |
| EBF1                   | NM_024007                             |
| ELOVL6                 | NM_024090; NM_001130721               |
| ERG                    | NM_001136155                          |
| EVI2B                  | NM_006495                             |
| FLT3                   | NM_004119                             |
| FUT4                   | NM_002033                             |
| GNAQ                   | NM_002072                             |
| HIPK3                  | NM_001278163; NM_005734; NM_001278162 |
| HIVEP2                 | NM_006734                             |
| HMGA2                  | NM_003483                             |

|             |                                                     |
|-------------|-----------------------------------------------------|
| HMGB1       | NM_002128                                           |
| HNRNPF      | NM_001098205; NM_004966; NM_001098204               |
| IER2        | NM_004907                                           |
| IGF1R       | NM_000875                                           |
| IKZF1       | NM_001220767                                        |
| JMJD1C      | NM_032776; NM_004241                                |
| KLRC4-KLRK1 | NM_001199805                                        |
| KLRK1       | NM_007360                                           |
| LAT2        | NM_032464                                           |
| LEF1        | NM_016269; NM_001166119                             |
| LEF1-AS1    | NR_029374                                           |
| LMO4        | NM_006769                                           |
| LOC728175   | NR_040108                                           |
| LRMP        | NM_001204126                                        |
| LRRFIP2     | NM_001134369                                        |
| MAFG        | NM_032711                                           |
| MAP3K1      | NM_005921                                           |
| MBNL1       | NM_207297; NM_207292                                |
| MEF2C       | NM_001193349; NM_002397                             |
| MEIS1       | NM_002398                                           |
| NR3C1       | NM_001018076; NM_001204259                          |
| NUSAP1      | NM_018454                                           |
| PAN3        | NM_175854                                           |
| PAX5        | NM_016734                                           |
| PDE4DIP     | NM_001002811                                        |
| PHLPP1      | NM_194449                                           |
| PIK3CD      | NM_005026                                           |
| PKM         | NM_001206798                                        |
| PLEK        | NM_002664                                           |
| PPP2R5C     | NM_001161726; NM_178586                             |
| PPP6R1      | NM_014931                                           |
| PROM1       | NM_001145848; NM_001145847                          |
| PTEN        | NM_000314                                           |
| PTPN6       | NM_002831                                           |
| PTPRR       | NM_001207015; NR_073474; NM_001207016               |
| RCC1        | NM_001048199                                        |
| REEP3       | NM_001001330                                        |
| RHOH        | NM_001278368; NM_004310; NM_001278367; NM_001278369 |
| RNF19B      | NM_153341                                           |
| RNF220      | NM_018150                                           |
| ROBO1       | NM_133631                                           |
| RPSAP52     | NR_026825                                           |
| RUNX1       | NM_001754; NM_001122607                             |
| RUNX2       | NM_001015051; NM_001278478; NM_004348               |
| SEMA3A      | NM_006080                                           |

|           |                                 |
|-----------|---------------------------------|
| SENP6     | NM_001100409                    |
| SMC4      | NM_005496; NM_001002800         |
| SOX11     | NM_003108                       |
| SPEN      | NM_015001                       |
| SPN       | NM_001030288                    |
| SPRY4     | NM_030964                       |
| ST8SIA4   | NM_175052; NM_005668            |
| STC2      | NM_003714                       |
| STK17B    | NM_004226                       |
| SUPT3H    | NM_003599                       |
| SYK       | NM_001135052; NM_001174168      |
| SYT1      | NM_001135805                    |
| TAPT1     | NM_153365                       |
| TAPT1-AS1 | NR_027697                       |
| TBC1D14   | NM_001113361; NM_020773         |
| TGFBR2    | NM_001024847                    |
| TGIF1     | NM_173209; NM_173208; NM_173207 |
| TMPO      | NM_001032284                    |
| TNRC18    | NM_001080495                    |
| TPD52     | NM_001025253                    |
| TRHDE     | NM_013381                       |
| TRHDE-AS1 | NR_026837                       |
| TSC22D2   | NM_014779                       |
| UBASH3B   | NM_032873                       |
| ZC3H12C   | NM_033390                       |
| ZC3HAV1   | NM_020119                       |
| ZCCHC6    | NM_001185059                    |
| ZCCHC7    | NM_032226                       |
| ZEB2      | NM_014795                       |
| ZMYND8    | NM_012408                       |

**Table S3, Spreading MLL-AF6 gene targets, Related to Figure 4A.**

| <b>Gene Name (38)</b> | <b>Gene Isoforms (47), RefSeq ID</b> |
|-----------------------|--------------------------------------|
| ADAMTS19              | NM_133638                            |
| APOLD1                | NM_001130415                         |
| ARID2                 | NM_152641                            |
| CD69                  | NM_001781                            |
| CDK13                 | NM_031267                            |
| CLEC2A                | NM_001130711                         |
| CLEC2B                | NM_005127                            |
| CPEB2                 | NM_001177382                         |
| DACH1                 | NM_004392                            |
| DLX6-AS1              | NR_015448                            |
| EMB                   | NM_198449                            |
| FAM169A               | NR_046462; NM_015566                 |
| FOXP1                 | NM_001012505; NM_001244808           |
| FRY                   | NM_023037                            |
| JMJD1C                | NM_032776                            |
| LOC646762             | NR_024278                            |
| MBNL1                 | NM_021038                            |
| MEF2C                 | NM_001193349; NM_001193350           |
| MYB                   | NM_001161659                         |
| MYO6                  | NM_004999                            |
| NPAS3                 | NM_001164749                         |
| PARP8                 | NM_001178055; NM_024615              |
| PTPRK                 | NM_002844; NM_001135648              |
| RBMS1                 | NM_002897                            |
| REEP3                 | NM_001001330                         |
| RNF220                | NM_018150                            |
| RUNX2                 | NM_004348; NM_001278478              |
| SATB1                 | NM_001131010; NM_002971              |
| SENP6                 | NM_015571                            |
| SSPN                  | NM_005086; NM_001135823              |
| SUPT3H                | NM_181356                            |
| SYDE2                 | NM_032184                            |
| TAPT1-AS1             | NR_027697                            |
| TCF4                  | NM_001243226; NM_001243230           |
| TCTEX1D1              | NM_152665                            |
| TRPS1                 | NM_014112                            |
| ZEB2                  | NM_014795                            |
| ZNF521                | NM_015461                            |

**Table S4, Gene targets common to 5 spreading MLL-FPs, Related to Figure 4G.**

| <b>Gene Name (9)</b> | <b>Gene Isoforms (10), RefSeq ID</b> | <b>MRD (COG)</b> | <b>OS (COG or ECOG)</b> | <b>Relapse</b> |
|----------------------|--------------------------------------|------------------|-------------------------|----------------|
| ARID2                | NM_152641                            |                  | poor                    |                |
| CPEB2                | NM_001177382                         |                  |                         |                |
| JMJD1C               | NM_032776                            |                  |                         | ✓              |
| MBNL1                | NM_021038                            | ✓                |                         | ✓              |
| MEF2C                | NM_001193349                         |                  |                         |                |
| REEP3                | NM_001001330                         |                  |                         |                |
| RUNX2                | NM_004348; NM_001278478              | ✓                |                         | ✓              |
| SENP6                | NM_015571                            |                  |                         |                |
| ZEB2                 | NM_014795                            |                  |                         |                |



**Table S5, (excel file) P-values for patient gene expression data, Related to Figure 4 and Figure S5**

**Table S6, Spreading MLL-AF4 gene targets downregulated at different concentrations of EPZ-5676, Related to Figure 7A.**

| <b>1<math>\mu</math>M unique</b> | <b>2<math>\mu</math>M unique</b> | <b>1<math>\mu</math>M &amp; 2<math>\mu</math>M overlap</b> | <b>05<math>\mu</math>M, 1<math>\mu</math>M &amp; 2<math>\mu</math>M overlap</b> |
|----------------------------------|----------------------------------|------------------------------------------------------------|---------------------------------------------------------------------------------|
| TPD52                            | STC2                             | LEF1                                                       | CPEB2                                                                           |
| SENP6                            | CNST                             | RUNX1                                                      | PROM1                                                                           |
| LRRFIP2                          | PHLPP1                           | SPRY4                                                      | AFF1                                                                            |
|                                  | RNF220                           | JMJD1C                                                     | ERG                                                                             |
|                                  | TNRC18                           | LEF1-AS1                                                   | ARHGDIB                                                                         |
|                                  | ANP32A                           | BCL2                                                       | HMGA2                                                                           |
|                                  | SOX11                            | CDCA7                                                      | DIAPH1                                                                          |
|                                  | PPP6R1                           | ZMYND8                                                     | BCL11A                                                                          |
|                                  | PKM                              | CACNB4                                                     | ZC3HAV1                                                                         |
|                                  | APOLD1                           | ZC3H12C                                                    | UBASH3B                                                                         |
|                                  | PAX5                             | ELOVL6                                                     | ARPP21                                                                          |
|                                  | IER2                             | HIPK3                                                      | CTBP2                                                                           |
|                                  |                                  | TSC22D2                                                    | HIVEP2                                                                          |
|                                  |                                  | SUPT3H                                                     | TGFBR2                                                                          |
|                                  |                                  | TRHDE                                                      | ARID1B                                                                          |
|                                  |                                  | SYT1                                                       | CDK6                                                                            |
|                                  |                                  | PPP2R5C                                                    | IKZF1                                                                           |
|                                  |                                  | SPEN                                                       | IGF1R                                                                           |
|                                  |                                  | HNRNPF                                                     |                                                                                 |
|                                  |                                  | MEF2C                                                      |                                                                                 |
|                                  |                                  | ARID2                                                      |                                                                                 |
|                                  |                                  | TBC1D14                                                    |                                                                                 |
|                                  |                                  | CAMK2D                                                     |                                                                                 |
|                                  |                                  | CELF2                                                      |                                                                                 |
|                                  |                                  | TAPT1                                                      |                                                                                 |
|                                  |                                  | TRHDE-AS1                                                  |                                                                                 |
|                                  |                                  | MAFG                                                       |                                                                                 |
|                                  |                                  | ZCCHC7                                                     |                                                                                 |
|                                  |                                  | CDK14                                                      |                                                                                 |

**Table S7, Datasets from previous publications, Related to Figures 1 and 3-6**

| <u>ChIP-seq</u>             |                                |                                                                                                   |
|-----------------------------|--------------------------------|---------------------------------------------------------------------------------------------------|
| <b>Cell Line</b>            | <b>Antibody</b>                | <b>Accession Number</b>                                                                           |
| SEM                         | MLLN                           | GEO: GSE74812                                                                                     |
|                             | AF4                            |                                                                                                   |
|                             | H3K4me3                        |                                                                                                   |
|                             | H3K4me1                        |                                                                                                   |
|                             | H3K27ac                        |                                                                                                   |
|                             | H3K79me2                       |                                                                                                   |
|                             | CFP1                           |                                                                                                   |
|                             | ENL                            |                                                                                                   |
|                             | ATAC-seq                       |                                                                                                   |
|                             | (MLL-AF4 gene list)            | GEO: GSE13313                                                                                     |
| MV4;11                      | MLLN                           | GEO: GSE73528                                                                                     |
|                             | MLLC                           |                                                                                                   |
|                             | AF4C                           |                                                                                                   |
| Human CD34+                 | FLAG (MLL-Af4)                 | GEO: GSE84116                                                                                     |
| mES                         | Streptavidin (MLL-AF9)         | GEO: GSE29130                                                                                     |
|                             | ER (MLL-ENL)                   | ArrayExpress: E-MTAB-3593                                                                         |
| <u>Patient data</u>         |                                |                                                                                                   |
| <b>Clinical Trial</b>       | <b>Patient Type</b>            | <b>Accession Number</b>                                                                           |
| ECOG E2993                  | Various ALL subtypes           | GEO: GSE34861                                                                                     |
| COG P9906                   | Various ALL subtypes           | GEO: GSE28460                                                                                     |
| St Jude's Research Hospital | Various pediatric ALL subtypes | <a href="http://www.stjude.com/research/data/ALL3/">http://www.stjude.com/research/data/ALL3/</a> |

## Supplemental Experimental Procedures

### Cell lines and culture

SEM, (Greil et al., 1994) ML-2 (Ohyashiki et al., 1986), RCH-ACV (Jack et al., 1986) and KOPN-8 (Matsuo and Drexler, 1998) were purchased from DSMZ ([www.cell-lines.de](http://www.cell-lines.de)) and cultured in IMDM or RPMI 1640 supplemented with 10% FCS. THP1, MV4-11 and CCRF-CEM cells were purchased from ATCC ([www.lgcstandards-atcc.org](http://www.lgcstandards-atcc.org)) and cultured in RPMI 1640 supplemented with 10% FCS. SEM-K2 were kindly provided by Dr. Carolyn Felix (University of Pennsylvania, Philadelphia, PA). SEM-K2 cells are a subclone of SEM cells with identical features (Zweidler-McKay et al., 2005). HEK293T cells were cultured in DMEM supplemented with 10% FCS. Mouse ES cells with a TetO-array (TOT2N mESC) were kindly provided by Dr. Rob Klose (University of Oxford) and were grown in DMEM supplemented by with 10% FCS, LIF and  $\beta$ -mercaptoethanol. TOT2N mESCs were treated with doxycycline for 6 hours when appropriate for the ChIP studies. For the nascent RNA-seq studies, SEM cells were treated with the DOT1L inhibitor EPZ-5676 (Epizyme) for 7 days, with fresh inhibitor added on days 0, 3 and 6.

### Drug Treatment Studies

SEM2 cells were seeded at 40,000 cells /well in a 96 well plate. The cells were treated with a DMSO control, ABT-199 (320, 160, 80, 40, 20, 10, 5 nM and DMSO control) alone, or in combination with a 1:10 ratio of either EPZ5676, SGC0946 or MI503 (3200, 1600, 800, 400, 200, 100, 50 nM and DMSO control). Media was changed once at 72 hr, cells were split and kept at about 40,000 cells/well, CellTiter-Glo® Luminescent Cell Viability Assay was run at 7days. Calcsyn 2.0 software (Biosoft, Great Shelford, UK) was used to calculate IC<sub>50</sub> values and combination index.

### Human progenitor cell isolation

Samples: Mononuclear cells (MNC) from term cord blood (CB) and second trimester human fetal bone marrow (FBM) were used for the experiments. CB was collected under the auspices of a National Research Ethics Service-approved study with written informed consent. Human fetal bone samples were obtained through the Human Developmental Biology Resource ([www.hdbr.org](http://www.hdbr.org)).

Sample preparation: FBM was obtained by repeated flushing of the fetal long bones with DMEM (Gibco). CB and FBM samples were red cell and granulocyte depleted by density gradient separation with Ficoll-Paque Premium (GE Healthcare) to isolate MNC. MNC were either fixed fresh or following thawing after cryopreservation.

### Patient-derived MLL-AF4 primograft cells

L826 patient cells were obtained from Newcastle Haematological BioBank and as such are covered by a generic approval given by the Newcastle & North Tyneside Ethics Committee (REC reference number: 07/H0906/109+5). The mouse transplantation experiments are covered by a Home Office Project licence PPL 60/4552. The L826 cells were originally derived from a diagnostic ALL patient sample, which have been passed through an mouse prior to ChIP-seq analysis. To that end, L826 patient cells were engrafted in NSG mice and the primograft was harvested from a mouse spleen. Cells were thawed and maintained in RPMI with 20% serum before they were fixed for ChIP-seq experiments.

### siRNA experiments

Briefly, using a rectangle pulse EPI 2500 electroporator (Fischer, Heidelberg),  $7 \times 10^7$  SEM cells were subjected to a 10msec 350V (SEM) electroporation in the presence of 300 pmol siRNA. MLLAF4 siRNA sequences were obtained from (Thomas et al., 2005) and are the following: siMA6 (sense, AAGAAAAGCAGACCUACUCCA; antisense, UGGAGUAGGUCUGCUUUUCUUUU), targeting the MLL exon 9 and AF4 exon 4 MLL-AF4 fusion site present in SEM cells. As control siRNAs we used the mismatch control siMM (sense,AAAAGCUGACCUUCUCCAAUG; antisense, CAUUGGAGAAGGUCAGCUUUUCU). For Menin and PAF1 siRNA experiments in SEM cells, we used Ambion Silencer Select Negative Control #2 (catalog AM4613), PAF1#1 (4392420, s29267), PAF1#2 (4392420, s29269) and Menin (4392420, s8682). Electroporation conditions were the same as for MLL-AF4 siRNAs. For testing MLL-AF4 recruitment by Menin and PAF1, MLL-AF4 cDNA was transfected into TetR-Menin and TetR-PAF1 mES cells at 60-70% confluency, either alone or with mouse Ldgf (Psp1) siRNA (Dharmacon SMARTpool, L-056571-01-0005), using Lipofectamine 2000. Cells were collected 24 hours after transfection.

### Antibodies used for western blot analysis

$\alpha$ Menin (Bethyl, A300-105A),  $\alpha$ GAPDH (Bethyl, A300-641A),  $\alpha$ Flag (Sigma, F1804),  $\alpha$ PAF1 (Bethyl, A300-172A),  $\alpha$ CDK6 (Cell Signaling, 3136),  $\alpha$ BCL11A (Bethyl, A300-382A),  $\alpha$ BCL2 (Cell Signaling, 2870),

$\alpha$ RUNX1 (Cell Signaling, 4334),  $\alpha$ MEF2C (Cell Signaling, 5030),  $\alpha$ H3K79me3 (Diagenode, C15410068),  $\alpha$ H4 (Abcam, ab7311)

### Chromatin immunoprecipitation assays

For ChIP and ChIP-seq, fixed samples of up to  $10^8$  cells were sonicated on a Covaris (Woburn, MA) according to the manufacturers' recommendations. Ab:chromatin complexes were collected with a mixture of Protein A and Protein G Dynabeads (Life Technologies, Grand Island, NY) by using a magnet and were then washed three times with a solution of 50mM Hepes-KOH, pH 7.6, 500mM LiCl, 1mM EDTA, 1% NP-40, and 0.7% Na-deoxycholate. After a Tris-EDTA wash, samples were eluted, treated with RNase and proteinase K, and purified by using a Qiagen PCR purification kit. ChIP samples were quantified relative to inputs (Milne et al., 2009). Briefly, the amount of genomic DNA co-precipitated with antibody was calculated as a percentage of total input using the following formula:  $\Delta CT = CT(\text{input}) - CT(\text{ChIP})$ , total percentage =  $2\Delta CT \times 5.0\%$ . A 50- $\mu$ L aliquot taken from each of 1 mL of sonicated, diluted chromatin before Ab incubation served as the input, and thus the signal from the input samples represents 5% of the total chromatin used in each ChIP. CT values were determined by choosing threshold values in the linear range of each PCR reaction. TetR fusion proteins were detected in ChIP using an FS2 antibody.

### ChIP sequencing

ChIP samples were submitted to the Wellcome Trust Centre for Human Genetics for library preparation (Lamble et al., 2013) and sequencing. Samples were sequenced using a HiSeq 2000, a HiSeq 2500 and 50bp paired-end sequencing. Data were mapped to the *Homo sapiens* hg18 or *Mus musculus* mm10 genome using Bowtie. Conversion to bam files was done using samtools. Duplicate reads were removed and data was normalized to an input track, in SeqMonk. Peaks were called using the probe generator in SeqMonk and filtered to retain only those that showed a >3-fold enrichment over the input track. MLL-AF4 peaks were defined as any MLL(N) peaks that overlapped with at least one AF4(C) peak. Wild-type MLL peaks in SEM cells were defined as any MLL(N) peaks that did not overlap with an AF4(C) peak. Broad H3K4me3 peaks were defined as the top 5% widest peaks (kb) of H3K4me3, as in the original study (Benayoun et al., 2014). Super enhancers were defined using the HOMER (<http://homer.salk.edu/homer/index.html>) *findPeaks -style super* command, based on the algorithm of the original study (Whyte et al., 2013), with a combined BRD4, MED1, H3K27ac and H3K4me1 dataset. Data for heat maps and meta gene plots were generated using the HOMER *annotatePeaks* command. Heat maps of spreading peaks in Figure 5 were generated by using the Samtools *view -c* command to get the reads under the peaks in 2.5kb bins. The R package *ggplot2* was used to generate the heat map.

### Antibodies used for ChIP and ChIP-seq assays

$\alpha$ H3K36me3 (Diagenode, pAb-192-050),  $\alpha$ H3K27ac (Diagenode, C15410196),  $\alpha$ H3K4me3 (Diagenode, pAb-003-050),  $\alpha$ H3K4me1 (Diagenode, pAb-194-050),  $\alpha$ H3K79me2 (Active Motif, 39143),  $\alpha$ H3K79me3 (Diagenode, pAb-068-050),  $\alpha$ MLL1 (Bethyl, A300-086A),  $\alpha$ AF4 (abcam, 31812),  $\alpha$ KDM2B (gift from Dr Rob Klose (University of Oxford)),  $\alpha$ BRD4 (Bethyl, A301-985A),  $\alpha$ MED1 (Bethyl, A300-793A),  $\alpha$ Menin (Bethyl, A300-105A),  $\alpha$ PAF1 (Bethyl, A300-172A),  $\alpha$ LEO1 (A300-175A),  $\alpha$ CFP1 (Bethyl, A303-161A),  $\alpha$ ENL (A302-268A),  $\alpha$ FS2 (gift from Dr Rob Klose).

### Bio-CAP

Bio-CAP was performed as described previously (Blackledge et al., 2012). Briefly, 50 $\mu$ L biotinylated KDM2B CXXC domain (0.5 $\mu$ g/ $\mu$ L, a generous gift from Dr Rob Klose) was diluted with 425 $\mu$ L BC150 and added to 25 $\mu$ L BC150-rinsed magnetic neutravidin beads (Sera-Mag SpeedBeads NeutraAvidin Microparticles, Thermo Scientific). As a control, 25 $\mu$ L beads were also added to 475 $\mu$ L of BC150 alone. Tubes were rotated end-over-end at 4°C for 1 hour. Beads were washed 3 times with 1M CAP Buffer (1000mM NaCl; 20mM HEPES pH7.9; 0.1% Triton X-100; 12.5% glycerol), using a magnet, and then 100mM CAP Buffer. 100 $\mu$ L DNA (100ng/ $\mu$ L) was diluted with 900 $\mu$ L BC150 (10 $\mu$ L DNA (10%) was diluted with 90 $\mu$ L BC150 for input). 500 $\mu$ L of DNA in BC150 was added to KDM2B-hybridised beads and the other 500 $\mu$ L was added to the beads-only control. Tubes were incubated end-over-end at 4°C for 1 hour. After incubation, supernatant was removed from beads using a magnet – this was the flow-through material. Beads were washed twice with 100mM CAP Buffer. Material was then eluted from beads using increasing concentrations of salt: 300mM, 500mM, 700mM and 1M. This was done in 50 $\mu$ L CAP buffer at room temperature for 10 minutes, with gentle tapping, twice to give a total volume of 100 $\mu$ L for each elution. DNA was purified using a Qiagen PCR purification kit.

### Nascent RNA-seq

$10^8$  Cells were treated with 500 $\mu$ M 4-thiouridine (4-SU) for 1 hour. Cells were lysed using trizol and RNA was precipitated with ethanol. 4-SU-incorporated RNA was biotinylated by labelling with 1mg/ml Biotin-HPDP for 90 minutes at room temperature. Following chloroform extraction, labelled RNA was separated using magnetic

streptavidin beads. Beads were washed using a magnetic  $\mu$ MACS stand before RNA was eluted in two rounds of elution with 100 $\mu$ L 100mM DTT. RNA was purified using a Qiagen RNeasy MinElute kit. Samples were sequenced using a NextSeq 500 and 40bp paired-end sequencing.

### **Nascent RNA-seq and Gene Expression Analysis**

Following QC analysis with the fastQC package (<http://www.bioinformatics.babraham.ac.uk/projects/fastqc>), reads were aligned using STAR (Dobin et al., 2013) against the human genome assembly (NCBI build36 (hg18) UCSC transcripts). Reads that were identified as PCR duplicates using Samtools (Li et al., 2009) were discarded. For experiments that did not involve inhibitor or siRNA treatments, gene expression was measured by calculating the nascent RNA-seq reads over exons for each gene and normalizing to reads per sample and kb of exons and subsequently normalized to GAPDH expression. For inhibitor and siRNA experiments, gene expression levels were quantified as read counts using the featureCounts function (Liao et al., 2014) from the Subread package (Liao et al., 2014) with default parameters. The read counts were used for the identification of global differential gene expression between specified populations using the edgeR package (Robinson et al., 2010). RPKM values were also generated using the edgeR package. Genes were considered differentially expressed between populations if they had an adjusted  $p$ -value (FDR) of less than 0.05.

### **Transcriptional Variability**

Transcriptional variability of a gene was measured as the standard deviation of expression across four biological replicates of nascent RNA-seq

### **PCR Primers for RT-PCR**

The mouse Mll1 Taqman primer-probe set was as follows: Mll1 primer For: CTGAATGACCTCTCTGACTGTGAAGA, Mll1 probe: ACTCTTTCCTATTGGATAACAGTGTTCCTCGGG, Mll1 primer Rev: GGCATCTGTGGTGCTCCAGTA. MLL-AF4 SYBR Green primers were as follows: MLL-AF4 For: AGGTCCAGAGCAGAGCAAAC, MLL-AF4 Rev: CGGCCATGAATGGGTCATTTTC. Mouse GAPDH SYBR Green primers were as follows: GAPDH For: GTCTCCTGCGACTTCAGC, GAPDH Rev: TCATTGTCATACCAGGAAATGAGC. Mouse Ledgf For: CGATCAAGAGGGTGAAAAGAA, Ledgf Rev: TTGGCCTTTTAGCATGTTCC

### **PCR Primers for ChIP**

Negative control For: GGCTCCTGTAACCAACCACTACC, Negative control Rev: CCTCTGGGCTGGCTTCATTC; HOXA9 For: ATGCTTGTGGTTCTCCTCCAGTTG, HOXA9 Rev: CCGCCGCTCTCATTCTCAGC; HOXC8 For: AGACTTCTCCACCACGGCAC; HOXC8 Rev: TAAGCGAGCACGGGTTCTGC; BCL11A CGI1 For: ACACCCAGTGCCAGAAATTG, BCL11A CGI1 Rev: CGCGGGTCTGAGATTCATT; BCL11A CGI2 For: AGGCTGAGTGTGTGGAGAC, BCL11A CGI2 Rev: CGTTGGAAGCTGCCTTTGTT; BCL11A CGI3 For: GCCAGGCTAACATAGACCTCC, BCL11A CGI3 Rev: GAGGCCAACTCTTCCACTCC; ARID1B CGI2 For: AAGTGCCGTGACCTTCACAT, ARID1B CGI2 Rev: CCTTGCATTACCTCTGCCCA; CPEB2 CGI For: ATTGCTGGAGAAGGTGCGTG, CPEB2 CGI Rev: TCCCTCATTGGACAGCGAGA; CPEB2 non-CGI For: CATATGGGCCATCCTATTCTCTG, CPEB2 non-CGI Rev: GCTCTGGTTCTAACTCCTAGAAA; BCL6 For: ACAGAGGCTCAAAGGAAAACAA; BCL6 Rev: GCCTTAACTCCACAAGTTTGA; ARID2 For: GGGACTTGCGATTGGTTATTG; ARID2 Rev: CACCAGAGAGCCCTGTATTT; TET2 For: CCTCAAGGCAGCAACTAAGAAC; TET2 Rev: GAGTCACTCCCAGAGGTCCT; GNAQ For: GTCCATCATGGCGTGCT; GNAQ Rev: CGGACGGTACTCACCGA; MBNL1 For: CAGTCCTTTCCTGTCATGTTT; MBNL1 Rev: CAGACAGACACTTTGCCATTAC; SENP6 For: GAGAAGGGAGGGTATACTGGAA; SENP6 Rev: TCGTCTATCCCTCGTACTT; ETV6 For: TTCCTGGTGGCTCCTTTAAGAG; ETV6 Rev: ACTGACGTGAATTCCCAGCA; MYC For: GAGCAGCAGAGAAAGGGAGA; MYC Rev: CAGCCGAGCACTCTAGCTCT; SPT3 uCpG For: CATGTTTTACAGTGCCTGGTACG; SPT3 uCpG Rev: AGACTGCCCTCCTACGCTA; SPT3 non-uCpG For: GCTGAACCCAAATTTATATTGCC; SPT3 non-uCpG Rev: AGCTCTGAGGGTTACTGACCA

### **Patient Datasets and gene expression microarray data**

Microarray gene expression data from three large cohorts of patients with ALL were analyzed. These cohorts included the Eastern Cooperative Oncology Group (ECOG) Clinical Trial E2993 (GEO#: GSE34861) cohort: 191 total samples comprising 78 BCR-ABL1 patients, 6 E2A-PBX1 patients, 25 MLLr patients (t(4;11): 17, other MLLr: 8), and 82 other B-ALL patients; (Geng et al., 2012) the Children's Oncology Group (COG) Clinical Trial P9906 (GEO#: GSE28460) cohort: 207 total samples, 23 E2A-PBX1 patients, 21 MLLr patients,



3 RUNX1-ETV6 patients, 155 other B-ALL patients (trisomy 4 or 10 patients); (Harvey et al., 2010) and the St. Jude Research Hospital pediatric ALL clinical trial cohort: 132 total samples, 15 BCR-ABL1 patients, 18 E2A-PBX1 patients, 20 MLLr patients, 20 RUNX1-ETV6 patients, 17 hyperdiploid patients, 28 other B-ALL patients, 14 T-ALL patients (Ross et al., 2003). This last cohort has no GEO number, but raw data can be downloaded from the following site: <http://www.stjude-research.org/site/data/ALL3/>. The microarray data was normalized with RMA method (Bolstad et al., 2003) using Expression Console™ software (Version 1.1, Affymetrix, Santa Clara, CA) for the Affymetrix arrays HG-U133 plus2 (COG data, n=207) or NimbleScan software (version 2.5, Roche NimbleGen, Madison, WI) for the NimbleGen arrays HG18 60mer expression 385K platform (ECOG data, n=191). The patients in each clinical trial were grouped into subtypes according to their cytogenetic features: BCR-ABL, TCF3-PBX1, MLLr (MLL rearranged), TEL-AML1, or other ALLs which are negative to the above translocations. The downstream microarray analysis was performed using R version 2.14.0 (R Development Core Team. R: A Language and Environment for Statistical Computing. 2009, <http://www.R-project.org>). The heatmap was generated with Cluster Cluster/TreeView3.0 software (<http://bonsai.hgc.jp/~mdehoon/software/cluster/software.htm>).

### **Survival analysis**

In order to test if the “spreading” MLL-AF4 targets (n=117) consist of a prognostic biomarker model predictive of ALL survival we used the supervised principal components (superPC) algorithm developed by Bair and Tibshirani (Bair and Tibshirani, 2004) in two ALL clinical datasets: COG P9906 (n=207) and ECOG E2993 (n=165). Univariate Cox scores, which measure the correlation between gene expression levels and overall survival (OS) or relapse free survival (RFS) of the ALL patients, were computed for each gene in the gene lists (such as a total of  $N$  genes). Only genes with absolute Cox scores of greater than a specific threshold were retained for subsequent prediction (such as  $M$  genes,  $M \leq N$ ). This threshold was determined using a 10-fold cross-validation procedure that evaluated the prognostic significance of different thresholds within the dataset. A principal component analysis (PCA) was performed using the expression levels of the  $M$  genes as features. Then the first three principal components were used in a regression model to compute a prognostic score for each patient. According to these predicted prognostic scores, the patients were divided into two groups: 50% high-risk ( $>$  the median score) and 50% low-risk ( $\leq$  the median score). Not necessarily all the genes get used in the list, this analysis just allows us to conclude that there is a signature within the set that is predictive of a poor prognosis. The procedure was applied in both ALL cohorts. The Kaplan-Meier method was used to estimate overall survival (OS) and relapse-free survival (RFS). Log-rank test was used to compare survival differences between patient groups with high or low risk. The R packages ‘Superpc’ (Bair and Tibshirani, 2004) and ‘survival’ version 2.35-8 (Therneau, 2015) was used for the survival analysis.

## Supplemental References

- Bolstad, B.M., Irizarry, R.A., Astrand, M., and Speed, T.P. (2003). A comparison of normalization methods for high density oligonucleotide array data based on variance and bias. *Bioinformatics* 19, 185-193.
- Dobin, A., Davis, C.A., Schlesinger, F., Drenkow, J., Zaleski, C., Jha, S., Batut, P., Chaisson, M., and Gingeras, T.R. (2013). STAR: ultrafast universal RNA-seq aligner. *Bioinformatics* 29, 15-21.
- Greil, J., Gramatzki, M., Burger, R., Marschalek, R., Peltner, M., Trautmann, U., Hansen-Hagge, T.E., Bartram, C.R., Fey, G.H., Stehr, K., *et al.* (1994). The acute lymphoblastic leukaemia cell line SEM with t(4;11) chromosomal rearrangement is biphenotypic and responsive to interleukin-7. *Br J Haematol* 86, 275-283.
- Jack, I., Seshadri, R., Garson, M., Michael, P., Callen, D., Zola, H., and Morley, A. (1986). RCH-ACV: a lymphoblastic leukemia cell line with chromosome translocation 1;19 and trisomy 8. *Cancer Genet Cytogenet* 19, 261-269.
- Lamble, S., Batty, E., Attar, M., Buck, D., Bowden, R., Lunter, G., Crook, D., El-Fahmawi, B., and Piazza, P. (2013). Improved workflows for high throughput library preparation using the transposome-based Nextera system. *BMC Biotechnol* 13, 104.
- Li, H., Handsaker, B., Wysoker, A., Fennell, T., Ruan, J., Homer, N., Marth, G., Abecasis, G., Durbin, R., and Genome Project Data Processing, S. (2009). The Sequence Alignment/Map format and SAMtools. *Bioinformatics* 25, 2078-2079.
- Liao, Y., Smyth, G.K., and Shi, W. (2014). featureCounts: an efficient general purpose program for assigning sequence reads to genomic features. *Bioinformatics* 30, 923-930.
- Matsuo, Y., and Drexler, H.G. (1998). Establishment and characterization of human B cell precursor-leukemia cell lines. *Leuk Res* 22, 567-579.
- Milne, T.A., Zhao, K., and Hess, J.L. (2009). Chromatin immunoprecipitation (ChIP) for analysis of histone modifications and chromatin-associated proteins. *Methods Mol Biol* 538, 409-423.
- Ohyashiki, K., Ohyashiki, J.H., and Sandberg, A.A. (1986). Cytogenetic characterization of putative human myeloblastic leukemia cell lines (ML-1, -2, and -3): origin of the cells. *Cancer Res* 46, 3642-3647.
- Robinson, M.D., McCarthy, D.J., and Smyth, G.K. (2010). edgeR: a Bioconductor package for differential expression analysis of digital gene expression data. *Bioinformatics* 26, 139-140.
- Ross, M.E., Zhou, X., Song, G., Shurtleff, S.A., Girtman, K., Williams, W.K., Liu, H.C., Mahfouz, R., Raimondi, S.C., Lenny, N., *et al.* (2003). Classification of pediatric acute lymphoblastic leukemia by gene expression profiling. *Blood* 102, 2951-2959.
- Shi, A., Murai, M.J., He, S., Lund, G., Hartley, T., Purohit, T., Reddy, G., Chruszcz, M., Grembecka, J., and Cierpicki, T. (2012). Structural insights into inhibition of the bivalent menin-MLL interaction by small molecules in leukemia. *Blood* 120, 4461-4469.
- Therneau, T.M. (2015). A Package for Survival Analysis in S. version 2.35-8. <http://cran-project.org/package=survival>.
- Thomas, M., Gessner, A., Vornlocher, H.P., Hadwiger, P., Greil, J., and Heidenreich, O. (2005). Targeting MLL-AF4 with short interfering RNAs inhibits clonogenicity and engraftment of t(4;11)-positive human leukemic cells. *Blood* 106, 3559-3566.
- Zweidler-McKay, P.A., He, Y., Xu, L., Rodriguez, C.G., Karnell, F.G., Carpenter, A.C., Aster, J.C., Allman, D., and Pear, W.S. (2005). Notch signaling is a potent inducer of growth arrest and apoptosis in a wide range of B-cell malignancies. *Blood* 106, 3898-3906.
